# Supplementary material for: Highly efficient blue organic light-emitting diodes based on carbene-metal-amides
Source: Springer Nature journal article supplement (doi:10.1038/s41467-020-15369-8), 2020-04-09
Supplement: 41467_2020_15369_MOESM1_ESM.pdf [file 41467_2020_15369_MOESM1_ESM.pdf]

**Supplementary Information for**

**Highly Efficient Blue Organic Light-Emitting Diodes Based on Carbene-Metal-Amides**

Conaghan et al.

**Supplementary Figures**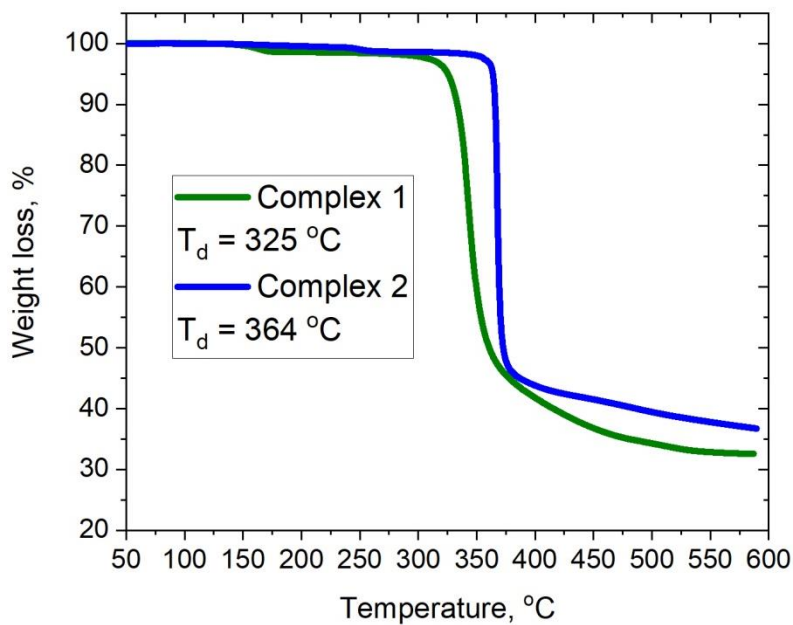**Supplementary Figure 1. TGA curves for gold complexes 1 and 2.**

Thermal gravimetric analysis (TGA) for complexes 1 and 2 with a decomposition temperature ( $T_d$ ).

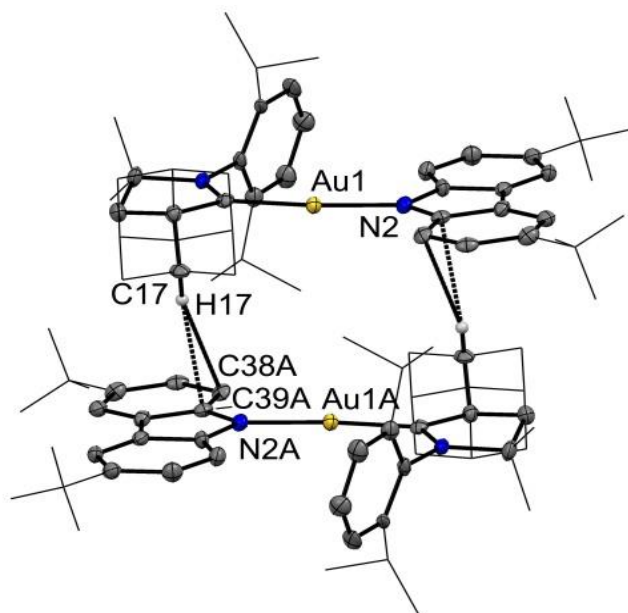**Supplementary Figure 2. Intermolecular interactions for complex 2.**

The scheme for the intermolecular C–H... $\pi$  interaction for complex 2. Ellipsoids are shown at 50 % probability.

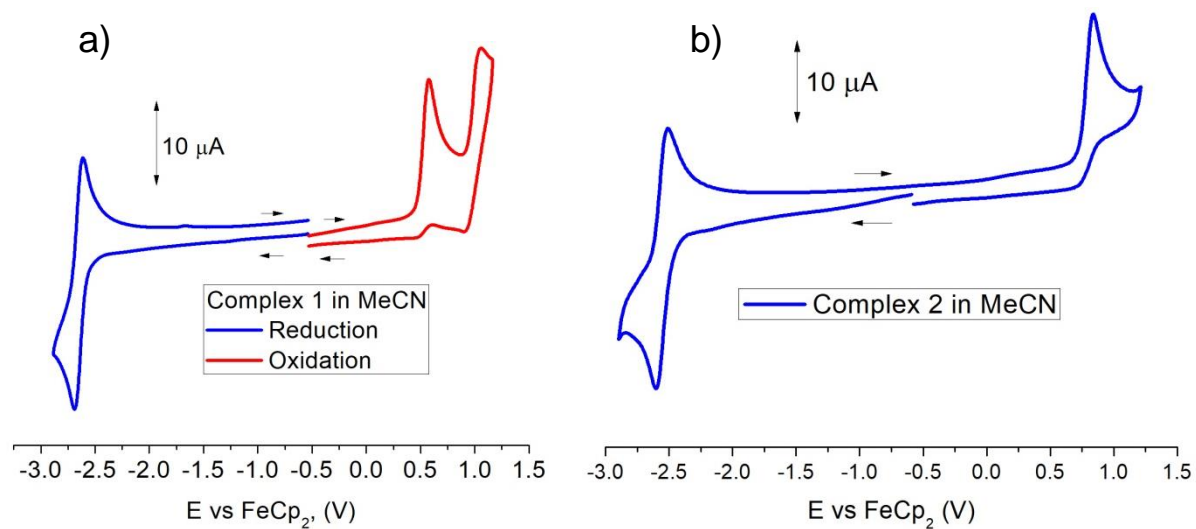

### Supplementary Figure 3. Cyclic voltammetry for complexes **1** and **2**.

(a) reduction (blue) and oxidation (red) cyclic voltammetry scans for gold complex **1**. (b) Full range cyclic voltammogram for gold complex **2**. Recorded using a glassy carbon electrode in MeCN solution (1.4 mM) with  $[\text{n-Bu}_4\text{N}]\text{PF}_6$  as supporting electrolyte (0.13 M), scan rate  $0.1 \text{ Vs}^{-1}$ .

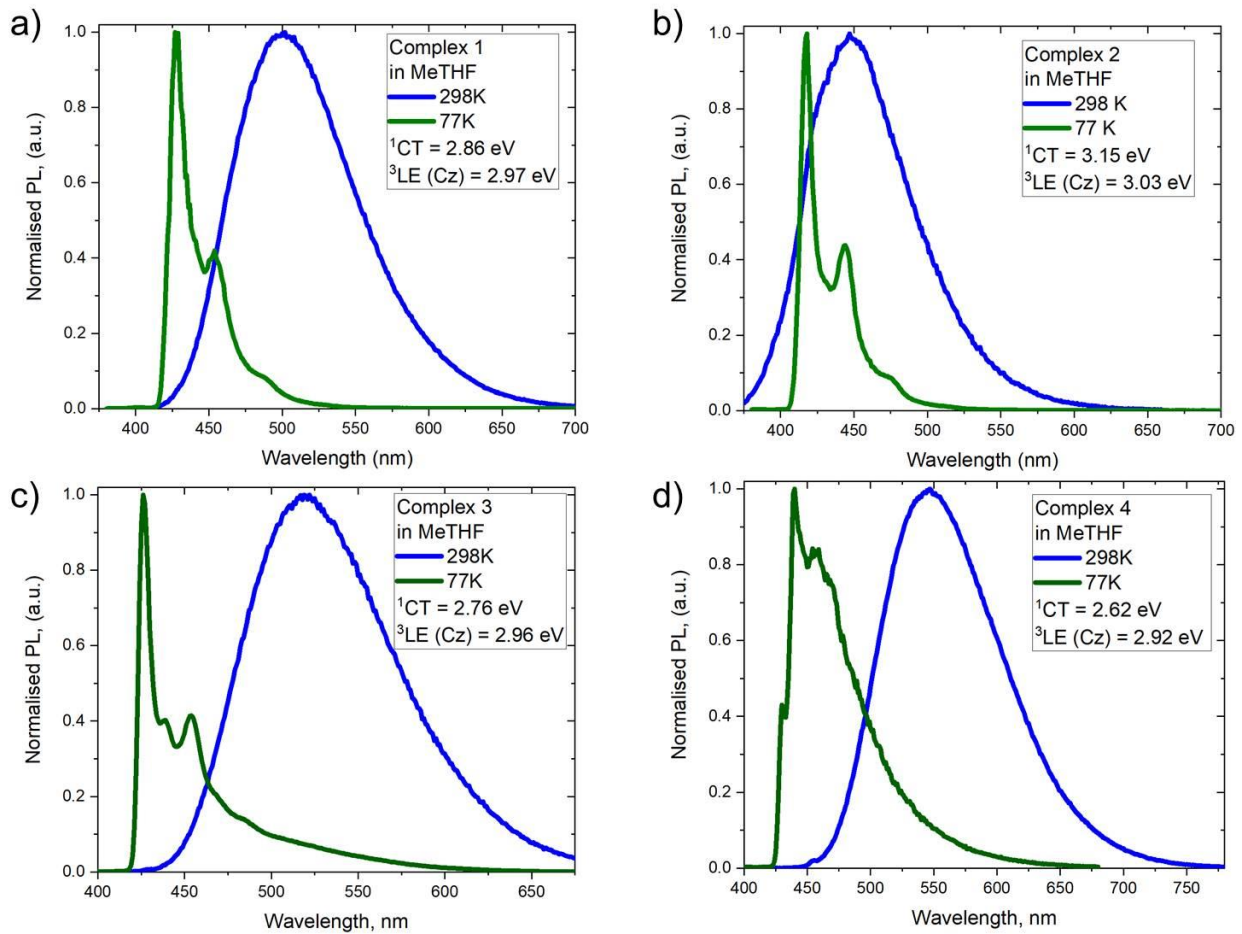

**Supplementary Figure 4. Photoluminescence spectra for complex 1–4.**

Emission spectra for complexes **CMA1** (a), **CMA4** (b), **1** (c) and **2** (d) in MeTHF solutions at 77 and 298K (excitation at 360 nm, under nitrogen).

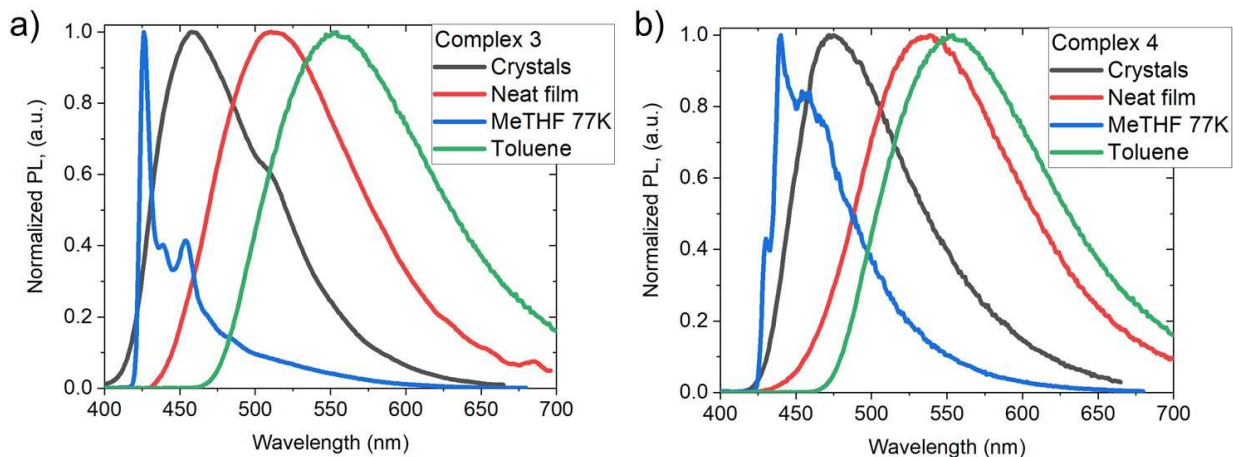

**Supplementary Figure 5. Photoluminescence spectra for complex 1–4.**

PL spectra of (a) **3** and (b) **4** at 298K as crystals, in neat film, in frozen MeTHF solution and in liquid toluene solution (excitation at 365 nm).

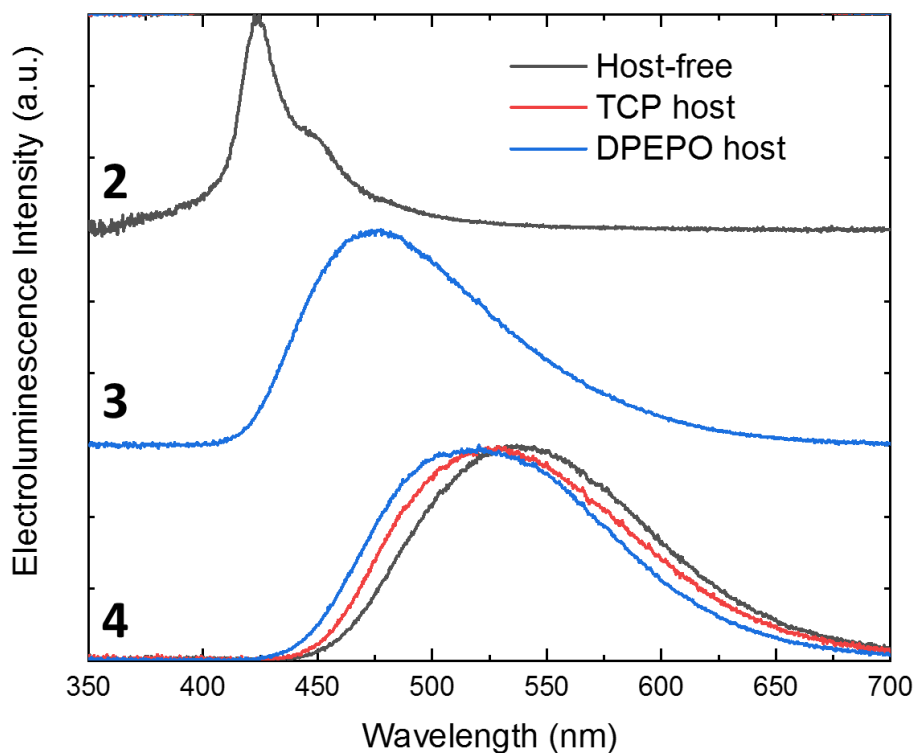

**Supplementary Figure 6. Electroluminescence spectra.**

Normalised electroluminescence spectra for devices incorporating **2**, **3** and **4** in host-free and host-guest structures.

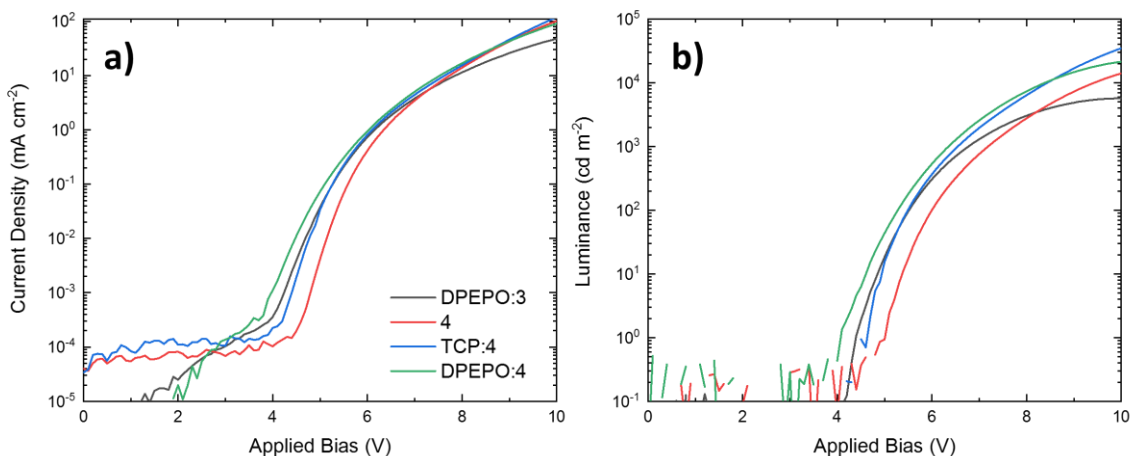

**Supplementary Figure 7. Current density-voltage-luminance (J-V-L) curves.**

**a** Current density-voltage. **b** luminance-voltage characteristics for OLEDs based on complexes **3** and **4**

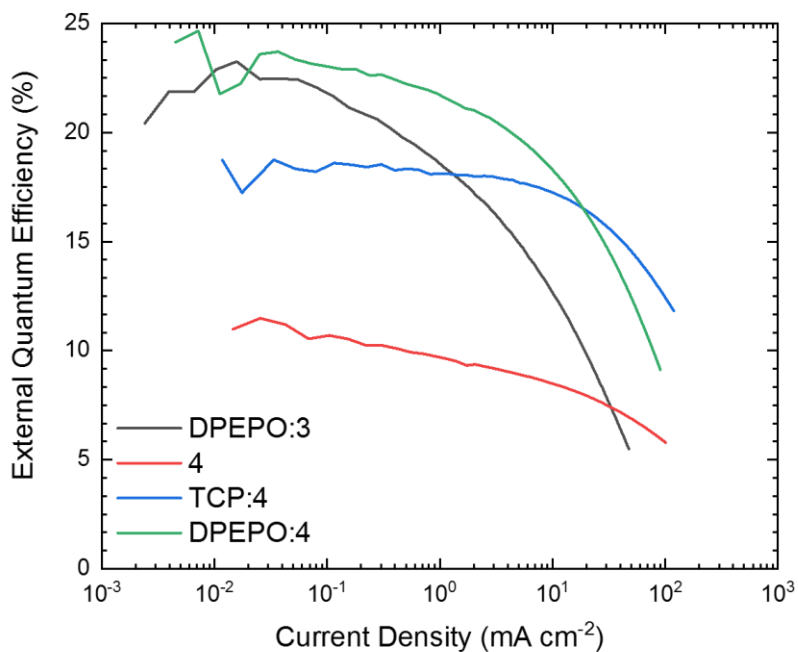

**Supplementary Figure 8. External electroluminescence quantum efficiency.**

External Quantum efficiency as a function of current density for OLEDs based on **3** and **4**.

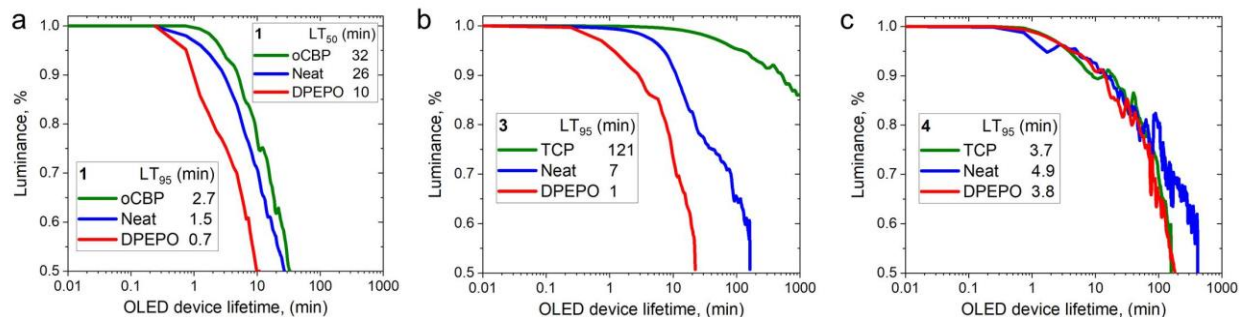

### Supplementary Figure 9. OLED device lifetime curves.

OLED device operating lifetime curves (initial luminance  $100 \text{ cd/m}^2$ ) at constant current under vacuum for complexes **1** (a), **3** (b) and **4** (c).

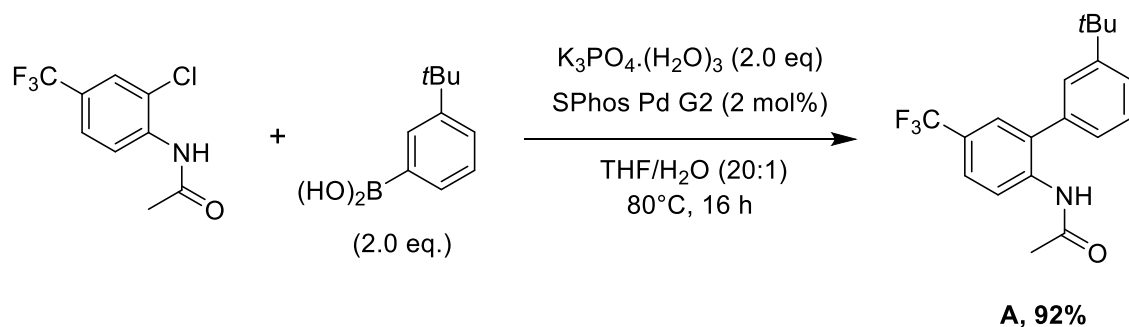

### Supplementary Figure 10. Synthesis of compound A.

Synthetic scheme to obtain *N*-(3'-(*tert*-butyl)-5-(trifluoromethyl)-[1,1'-biphenyl]-2-yl)acetamide (**A**).

a

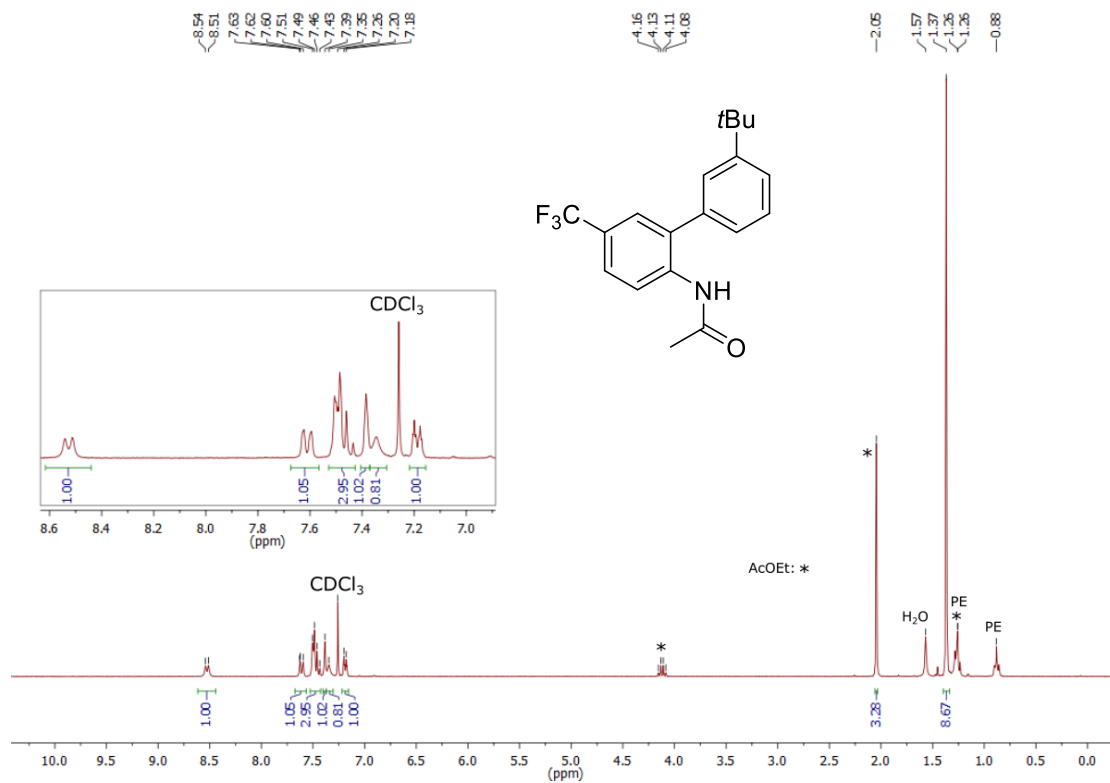

b

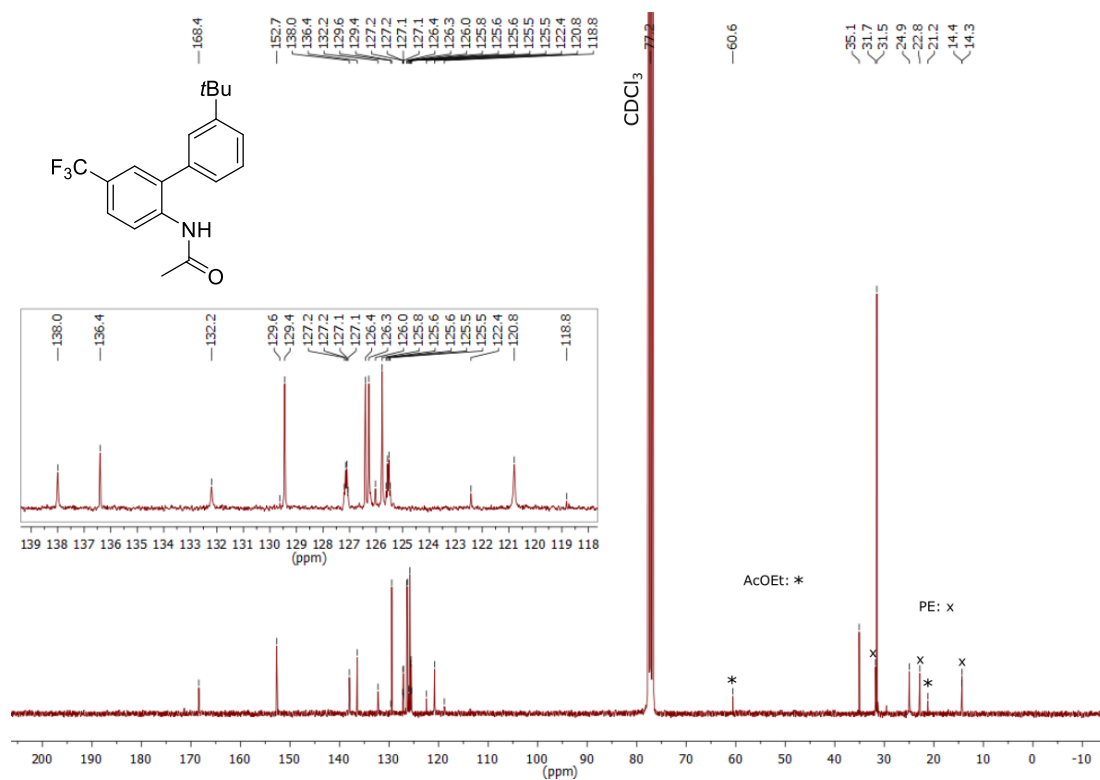



c

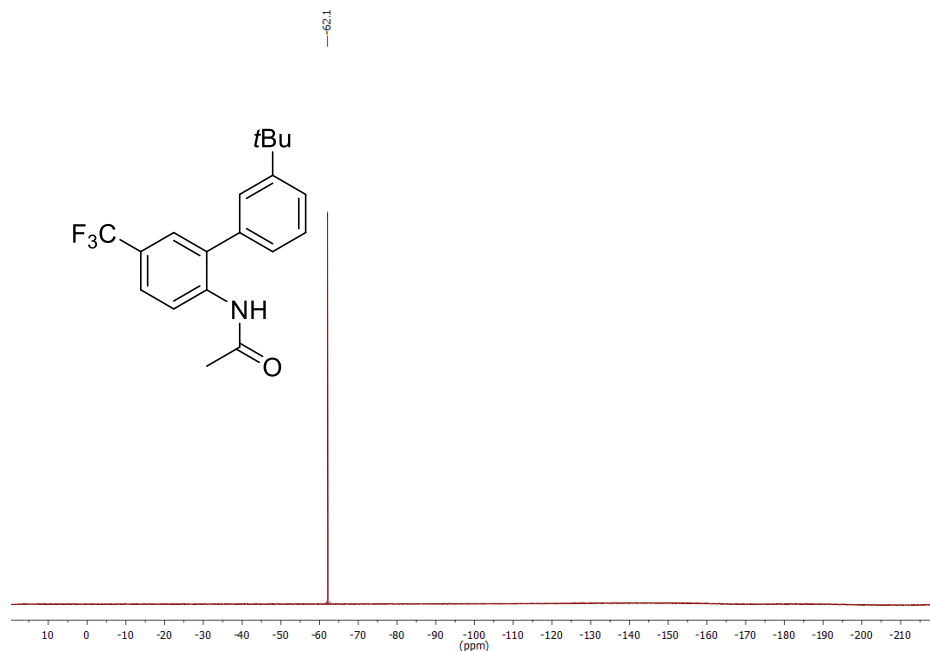

**Supplementary Figure 11. NMR spectra for *N*-(3'-(*tert*-butyl)-5-(trifluoromethyl)-[1,1'-biphenyl]-2-yl)acetamide.**

(a)  $^1\text{H}$  NMR (300 MHz,  $\text{CDCl}_3$ ); (b)  $^{13}\text{C}$  NMR (75 MHz,  $\text{CDCl}_3$ ); (c)  $^{19}\text{F}$  NMR (282 MHz,  $\text{CDCl}_3$ ).

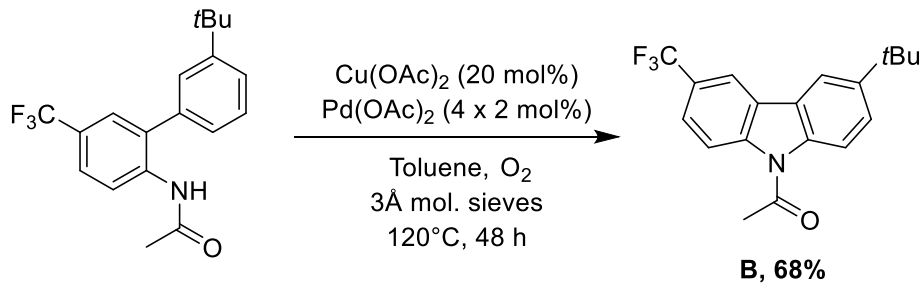

**Supplementary Figure 12. Synthesis of compound B.**

Synthetic scheme to obtain 6-(*tert*-butyl)-3-(trifluoromethyl)-9-acetylcarbazole (**B**).

**a**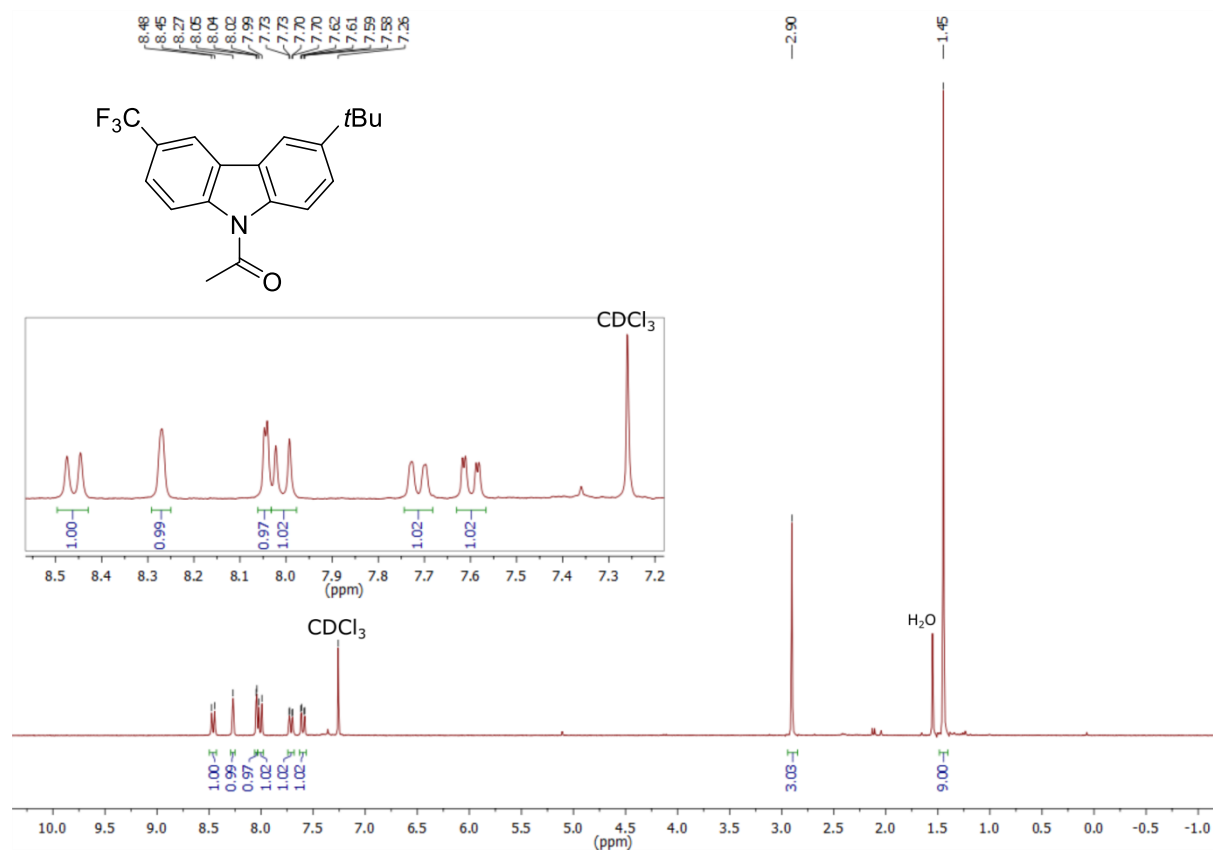

b

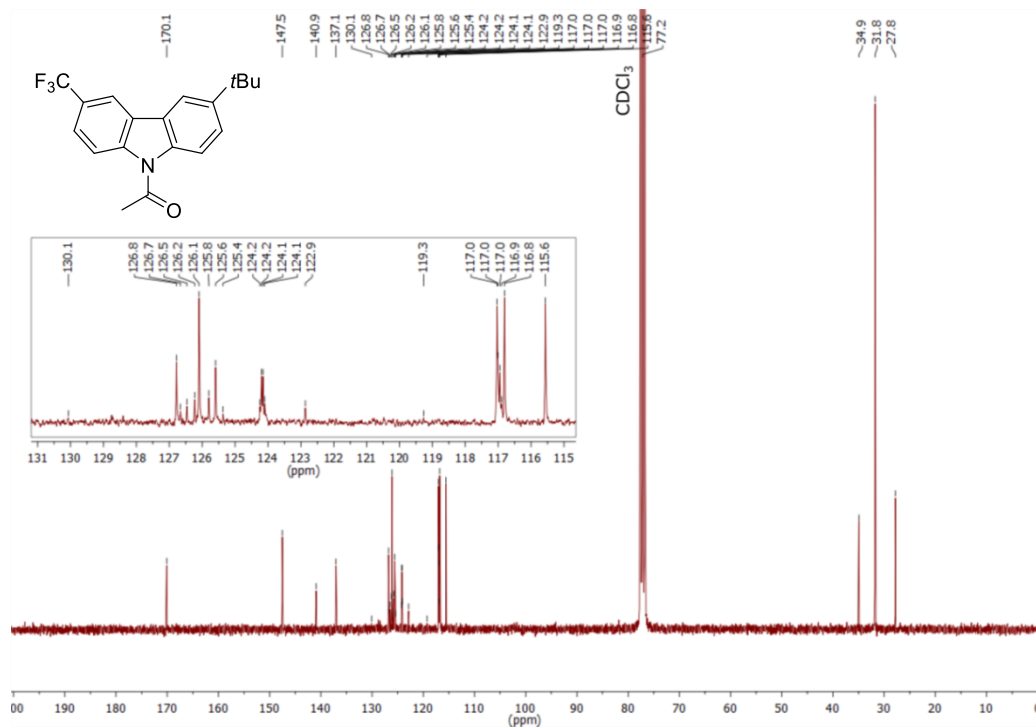

c

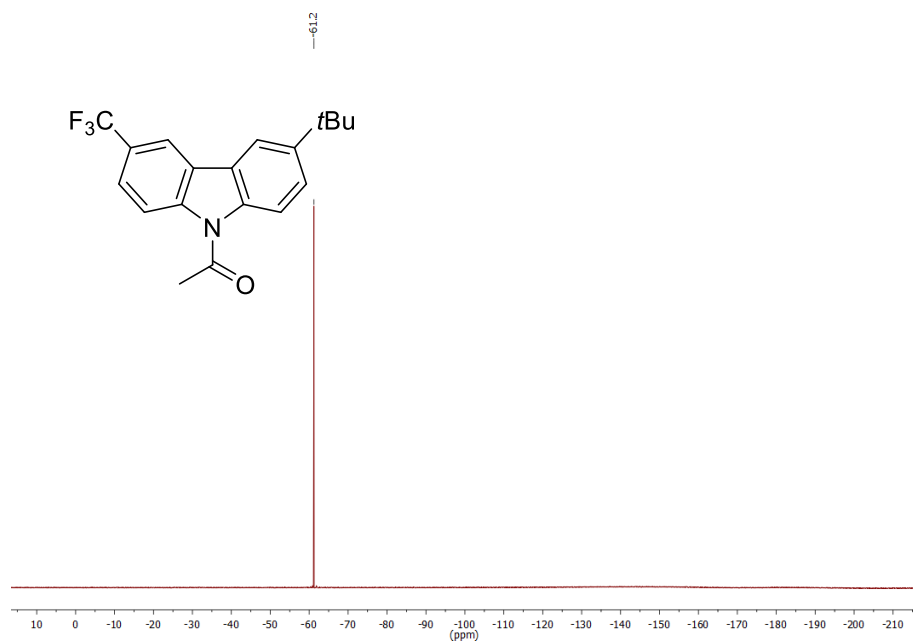

**Supplementary Figure 13. NMR spectra for 6-(*tert*-butyl)-3-(trifluoromethyl)-9-acetylcarbazole.**

(a) <sup>1</sup>H NMR (300 MHz, CDCl<sub>3</sub>); (b) <sup>13</sup>C NMR (75 MHz, CDCl<sub>3</sub>); (c) <sup>19</sup>F NMR (282 MHz, CDCl<sub>3</sub>).

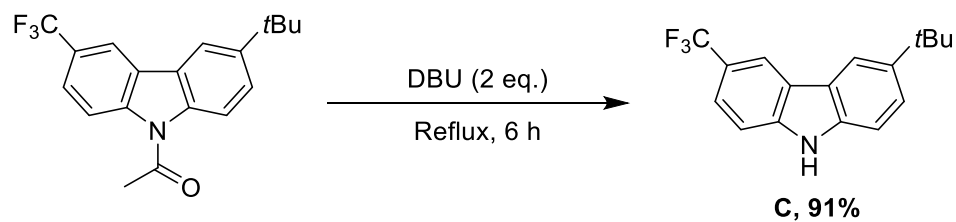

### Supplementary Figure 14. Synthesis of compound C.

Synthetic scheme to obtain 6-(*tert*-butyl)-3-(trifluoromethyl)-9H-carbazole (C).

**a**

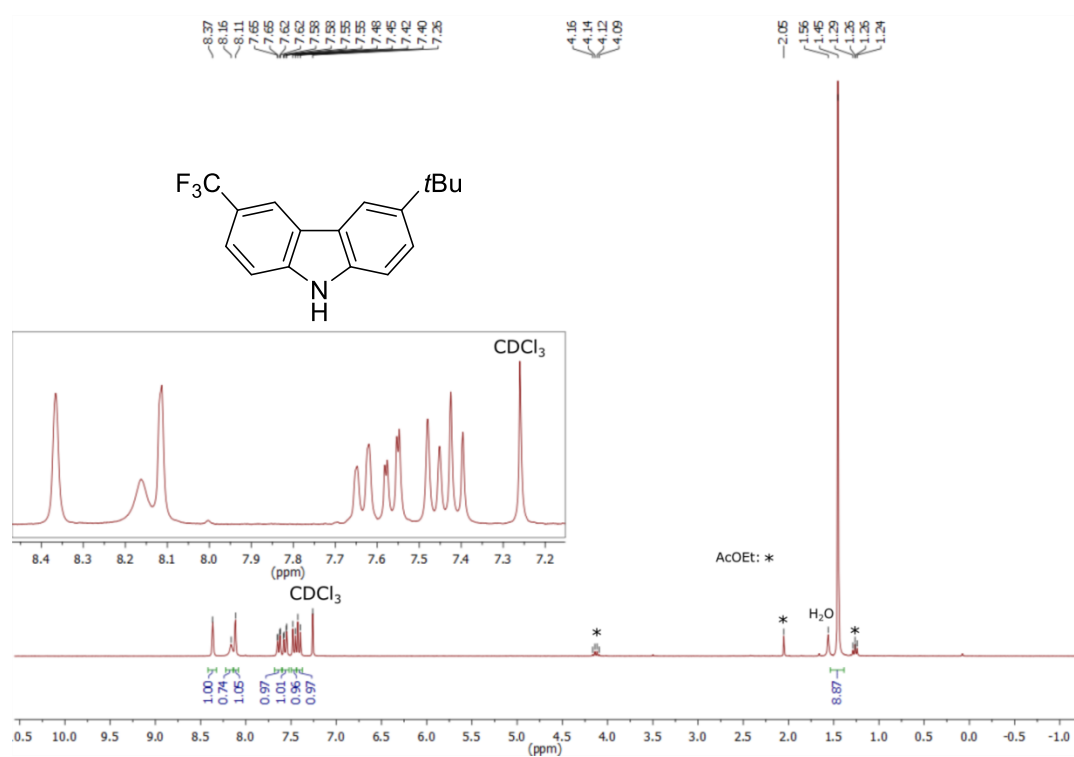

b

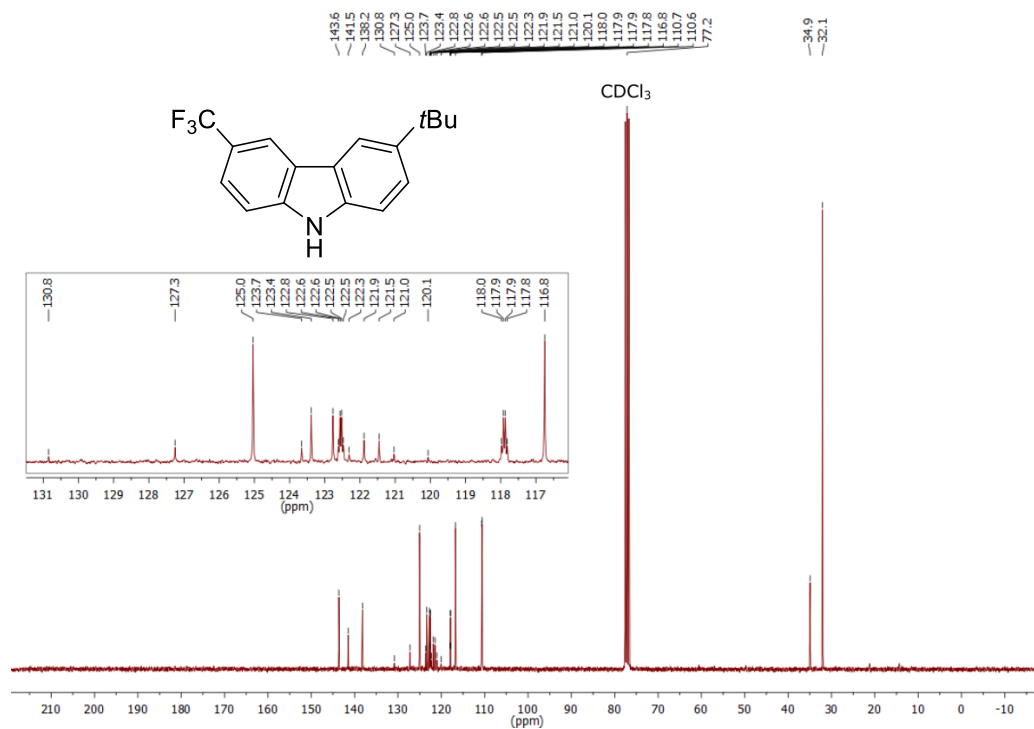

c

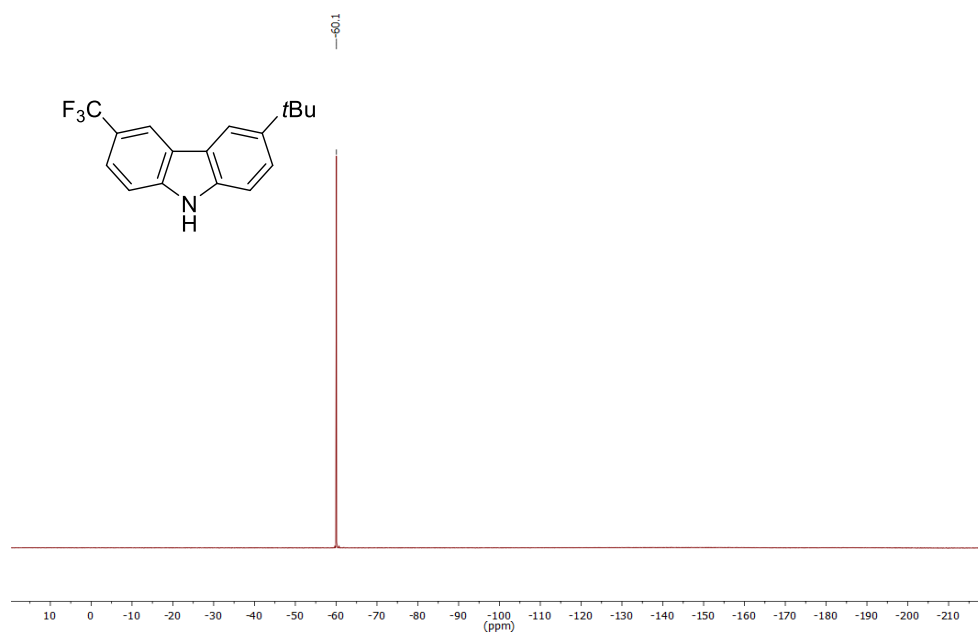

**Supplementary Figure 15. NMR spectra for 6-(*tert*-butyl)-3-(trifluoromethyl)-9-acetylcarbazole.**

(a) <sup>1</sup>H NMR (300 MHz, CDCl<sub>3</sub>); (b) <sup>13</sup>C NMR (75 MHz, CDCl<sub>3</sub>); (c) <sup>19</sup>F NMR (282 MHz, CDCl<sub>3</sub>).

a

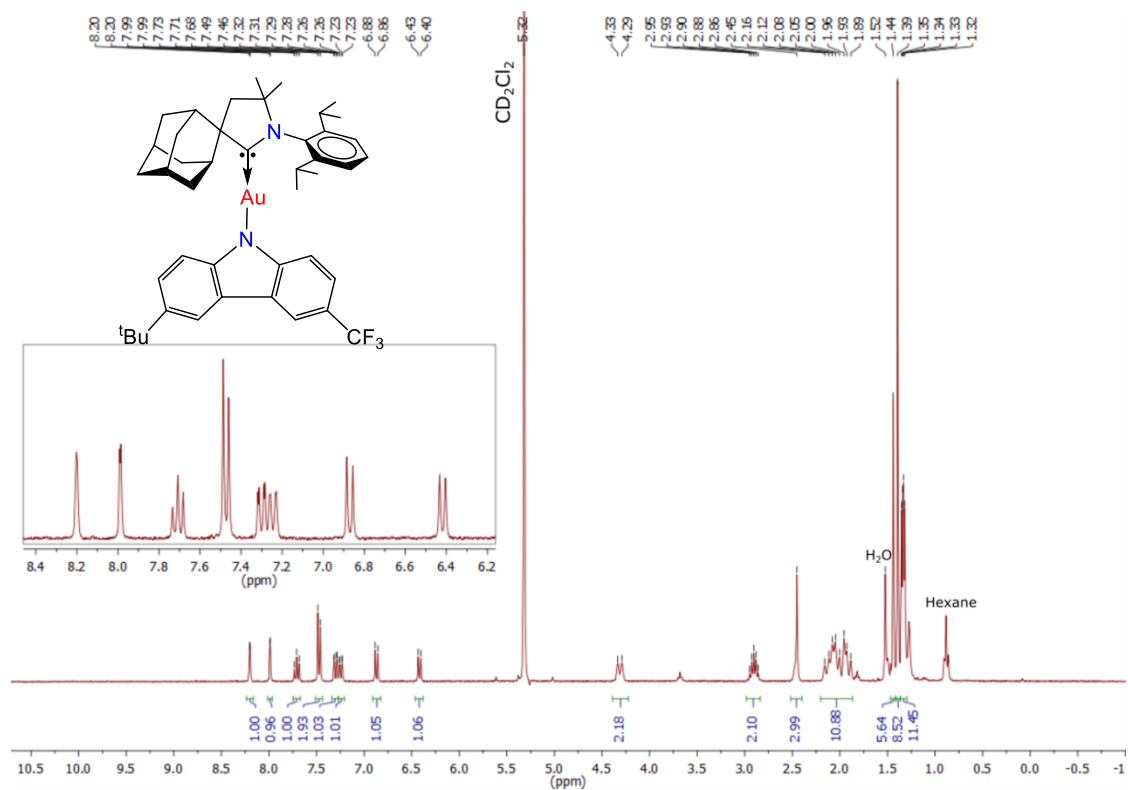

b

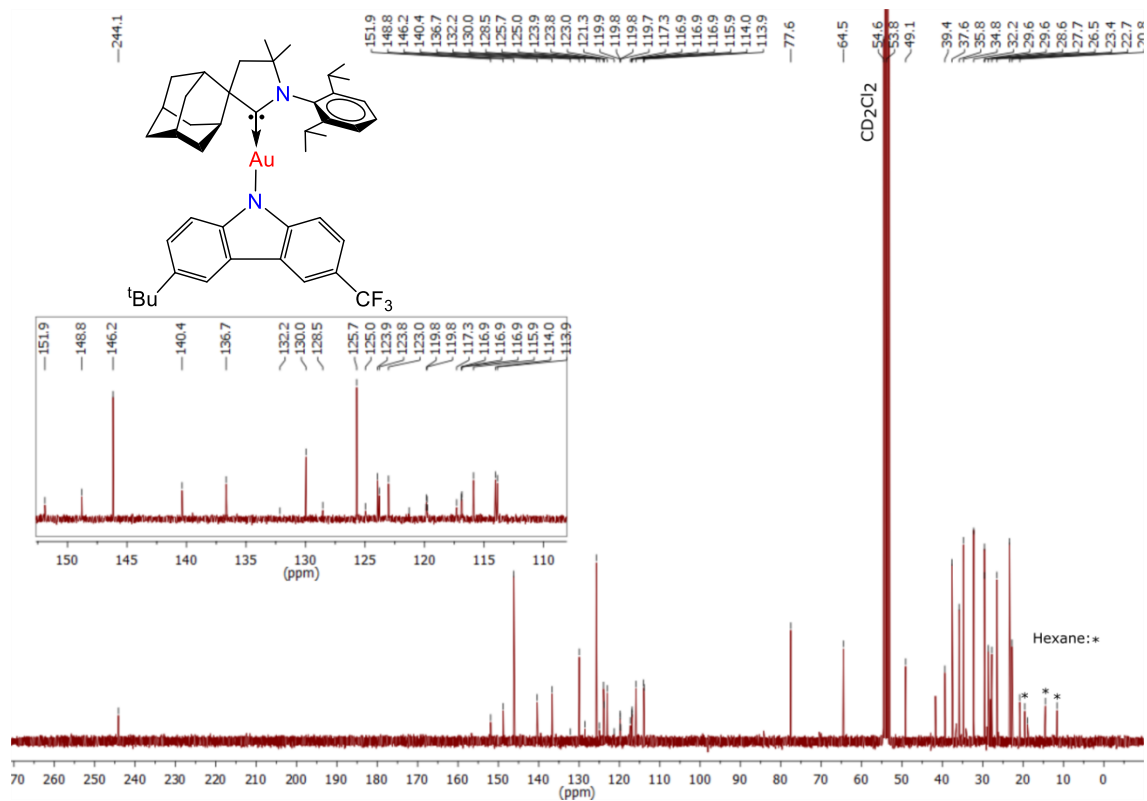

c

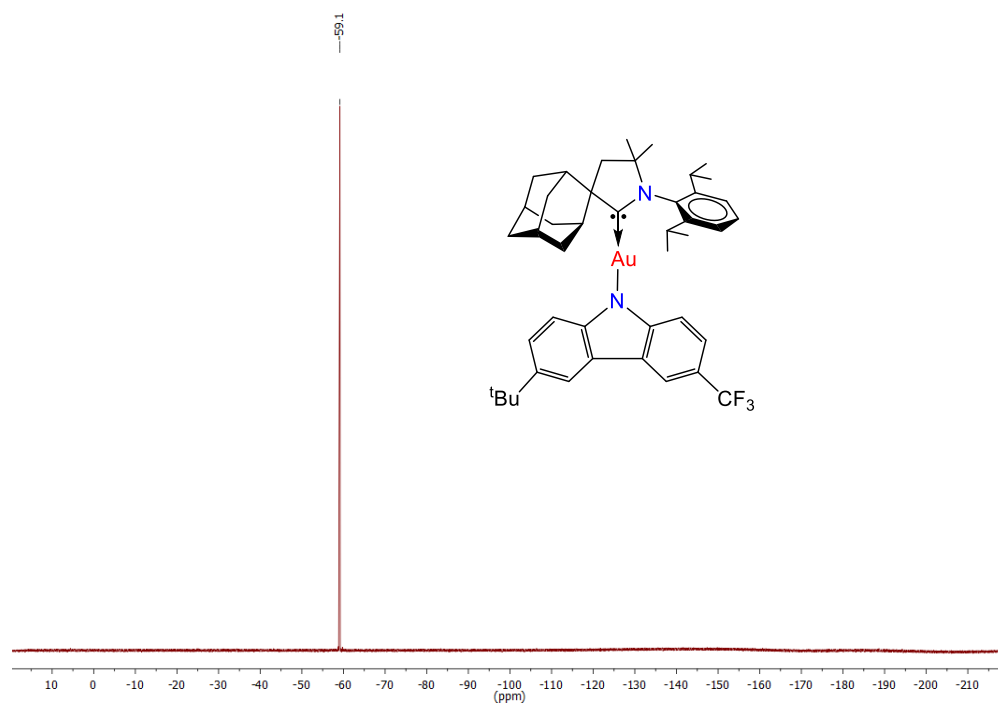**Supplementary Figure 16. NMR spectra for complex 1.**

(a)  $^1\text{H}$  NMR (300 MHz,  $\text{CDCl}_3$ ); (b)  $^{13}\text{C}$  NMR (75 MHz,  $\text{CDCl}_3$ ); (c)  $^{19}\text{F}$  NMR (282 MHz,  $\text{CDCl}_3$ ).

a

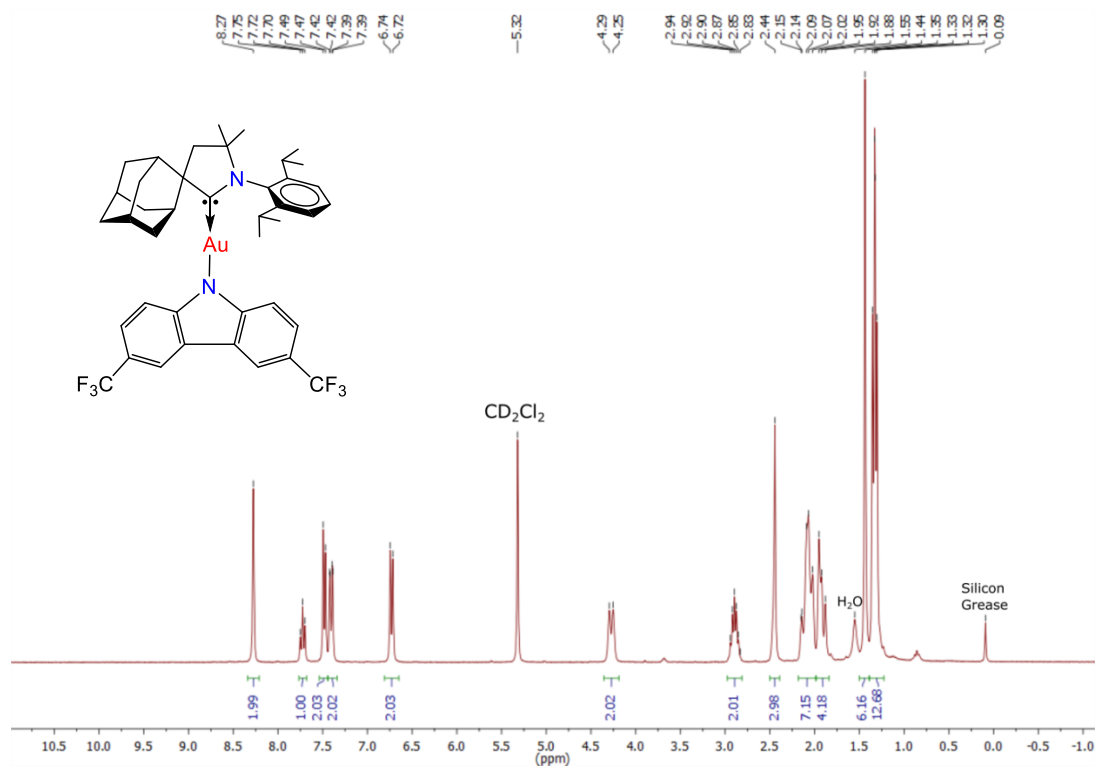

b

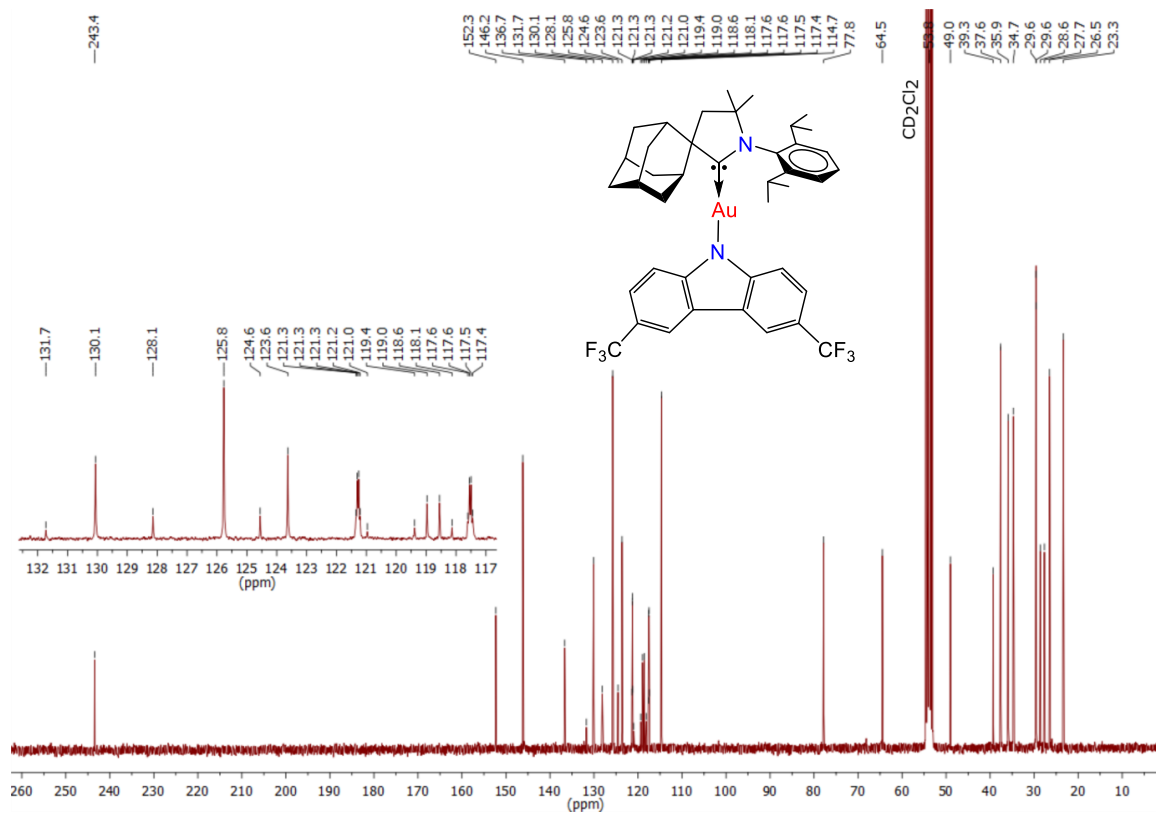



c

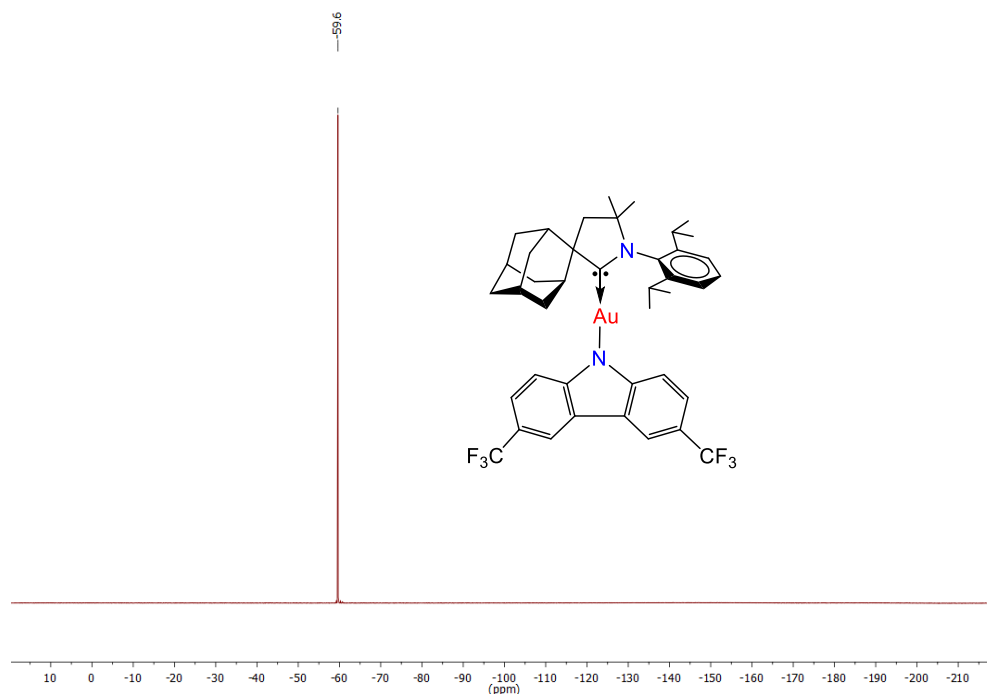

### Supplementary Figure 17. NMR spectra for complex 2.

(a)  $^1\text{H}$  NMR (300 MHz,  $\text{CDCl}_3$ ); (b)  $^{13}\text{C}$  NMR (75 MHz,  $\text{CDCl}_3$ ); (c)  $^{19}\text{F}$  NMR (282 MHz,  $\text{CDCl}_3$ ).

### Supplementary Methods

**Synthesis of *N*-(3'-(*tert*-butyl)-5-(trifluoromethyl)-[1,1'-biphenyl]-2-yl)acetamide:** *N*-(2-chloro-4-(trifluoromethyl)phenyl)acetamide (1 eq., 5.05 mmol, 1.20 g), 3-(*tert*-butyl)phenylboronic acid (2.0 eq., 10.1 mmol, 1.80 g) and potassium phosphate trihydrate (2.0 eq., 10.1 mmol, 2.33 g) were mixed in THF/ $\text{H}_2\text{O}$  20:1 (10 mL) and purged with argon. SPhos Pd G2 (1 mol%, 0.051 mmol, 37 mg) was added and the mixture was heated at 80°C for 16 h. Reaction was cooled to r.t.,  $\text{Et}_2\text{O}$  (30 mL) was added and the mixture was filtered through Celite<sup>®</sup>. The filtrate was diluted with AcOEt (100 mL), washed with water and brine, and dried with  $\text{MgSO}_4$ . The solvent was evaporated and the residue was purified by silica column chromatography (PE/AcOEt) to afford the product as an off-white solid (92%, 1.55 g).

$^1\text{H}$  NMR (300 MHz,  $\text{CDCl}_3$ ):  $\delta$  8.53 (d,  $J = 8.7$  Hz, 1H), 7.61 (pseudo dd,  $J = 8.7, 2.2$  Hz, 1H), 7.52 – 7.42 (m, 3 x 1H overlapped), 7.40 – 7.37 (m, 1H), 7.37 – 7.32 (bs, NH), 7.19 (pseudo dt,  $J = 6.6, 1.9$  Hz, 1H), 2.05 (s, 3H, Ac), 1.37 (s, 9H, *t*Bu).  $^{13}\text{C}$  NMR (75 MHz,  $\text{CDCl}_3$ )  $\delta$  168.4 (s,

C=O), 152.7 (s,  $\underline{\text{C}}\text{-}t\text{Bu}$ ), 138.0 (s,  $\text{C}_q$ ), 136.4 (s,  $\text{C}_q$ ), 132.2 (s,  $\text{C}_q$ ), 129.5 (s, CH), 127.1 (q,  $J = 3.6$  Hz,  $\underline{\text{C}}\text{H-C-CF}_3$ ), 126.4 (s, CH), 126.3 (s, CH), 125.8 (s, CH), 125.5 (q,  $J = 3.7$  Hz,  $\underline{\text{C}}\text{H-C-CF}_3$ ), 124.2 (q,  $J = 271.8$  Hz,  $\text{CF}_3$ ), 120.8 (s, CH), 35.1 (s,  $\underline{\text{C}}(\text{CH}_3)_3$ ), 31.5 (s,  $\text{C}(\underline{\text{C}}\text{H}_3)_3$ ), 25.0 (s,  $\text{CH}_3$  Ac), ( $\underline{\text{C}}_{\text{ipso}}\text{-CF}_3$  was not observed due to overlap with aromatic signals).  $^{19}\text{F}$  NMR (282 MHz,  $\text{CDCl}_3$ )  $\delta$  -62.1 ppm. Anal. Calcd. for  $\text{C}_{19}\text{H}_{20}\text{F}_3\text{NO}$  335.37: C, 68.05; H, 6.01; N, 4.18. Found: C, 68.17; H, 6.18; N, 4.31. See Supplementary Figs. 10 and 11.

**Synthesis of 6-(*tert*-butyl)-3-(trifluoromethyl)-9-acetylcarbazole:** In an oven-dried Schlenk tube, under argon, *N*-(3'-(*tert*-butyl)-5-(trifluoromethyl)-[1,1'-biphenyl]-2-yl)acetamide (1 eq., 4.47 mmol, 1.50 g),  $\text{Cu}(\text{OAc})_2$  (20 mol%, 0.89 mmol, 162 mg),  $\text{Pd}(\text{OAc})_2$  (2 mol%, 0.089 mmol, 20 mg) and 3 Å molecular sieves were mixed in toluene (20 mL). The flask was purged by oxygen and heated at 120°C. The  $\text{Pd}(\text{OAc})_2$  was added every 8 h ( $4 \times 20$  mg). The reaction was monitored by  $^{19}\text{F}$  NMR indicating full completion after 48 h. The mixture was cooled to r.t., diluted with AcOEt (60 mL) and filtered through Celite<sup>®</sup>. The filtrate was diluted with AcOEt (100 mL) washed with water and brine and dried with  $\text{MgSO}_4$ . The solvent was evaporated and the residue was purified by silica column chromatography (PE/AcOEt) to afford the product as an off-white solid (68%, 1.01 g).

$^1\text{H}$  NMR (300 MHz,  $\text{CDCl}_3$ ):  $\delta$  8.46 (d,  $J = 8.8$  Hz, 1H,  $\text{CH}^1$ ), 8.27 (pseudo s, 1H,  $\text{CH}^4$ ), 8.04 (d,  $J = 2.1$  Hz, 1H,  $\text{CH}^5$ ), 8.01 (d,  $J = 8.9$  Hz, 1H,  $\text{CH}^8$ ), 7.71 (pseudo dd,  $J = 8.8, 1.9$  Hz, 1H,  $\text{CH}^2$ ), 7.60 (dd,  $J = 8.9, 2.1$  Hz, 1H,  $\text{CH}^7$ ), 2.90 (s, 3H, Ac), 1.45 (s, 9H, *t*Bu).  $^{13}\text{C}$  NMR (75 MHz,  $\text{CDCl}_3$ )  $\delta$  170.1 (s, C=O), 147.5 ( $\underline{\text{C}}\text{-}t\text{Bu}$ ), 140.9 (s,  $\text{C}_q$ ), 137.1 (s,  $\text{C}_q$ ), 126.8 (s,  $\text{C}_q$ ), 126.1 (s,  $\text{CH}^7$ ), 126.0 (q,  $J = 32.6$  Hz,  $\underline{\text{C}}\text{-CF}_3$ ), 125.6 (s,  $\text{C}_q$ ), 124.7 (q,  $J = 271.7$  Hz,  $\text{CF}_3$ ), 124.2 (q,  $J = 3.6$  Hz,  $\text{CH}^2$ ), 117.0 (s,  $\text{CH}^1$  overlapped with  $\text{CH}^4$ ), 116.9 (q,  $J = 3.9$  Hz,  $\text{CH}^4$  overlapped with  $\text{CH}^1$ ), 116.8 (s,  $\text{CH}^5$ ), 115.6 (s,  $\text{CH}^8$ ), 34.9 (s,  $\underline{\text{C}}(\text{CH}_3)_3$ ), 31.8 ( $\text{C}(\underline{\text{C}}\text{H}_3)_3$ ), 27.8 (s,  $\text{CH}_3$  Ac).  $^{19}\text{F}$  NMR (282 MHz,  $\text{CDCl}_3$ )  $\delta$  -61.2. Anal. Calcd. for  $\text{C}_{19}\text{H}_{18}\text{F}_3\text{NO}$  (333.35): C, 68.46; H, 5.44; N, 4.20. Found: C, 68.13; H, 5.68; N, 3.97. See Supplementary Figs. 12 and 13.

**Synthesis of 6-(*tert*-butyl)-3-(trifluoromethyl)-9H-carbazole.** DBU (2 eq., 6.06 mmol, 904  $\mu\text{L}$ ) was added to 6-(*tert*-butyl)-3-(trifluoromethyl)-9-acetylcarbazole (1 eq., 3.03 mmol, 1.01 g) in MeOH (30 mL), and the mixture was refluxed for 6 h. The reaction was cooled to r.t. and volatiles were evaporated. AcOEt (120 mL) was added, washed with water and brine, and dried

over MgSO<sub>4</sub>. The residue was purified by silica column chromatography (PE/AcOEt) to afford the product as a white solid (91%, 800 mg).

<sup>1</sup>H NMR (300 MHz, CDCl<sub>3</sub>): δ 8.37 (s, 1H, CH<sup>4</sup>), 8.16 (bs, 1H, NH), 8.12 (pseudo s, 1H, CH<sup>5</sup>), 7.64 (pseudo dd, *J* = 8.5, 1.7 Hz, 1H, CH<sup>2</sup>), 7.56 (dd, *J* = 8.6, 1.9 Hz, 1H, CH<sup>8</sup>), 7.47 (d, *J* = 8.5 Hz, 1H, CH<sup>1</sup>), 7.41 (d, *J* = 8.6 Hz, 1H, CH<sup>7</sup>), 1.45 (s, 9H, *t*Bu). <sup>13</sup>C NMR (75 MHz, CDCl<sub>3</sub>) δ 143.6 (s, C-*t*Bu), 141.5 (s, C<sub>q</sub>), 138.2 (s, C<sub>q</sub>), 125.5 (q, *J* = 271.2 Hz, CF<sub>3</sub>), 125.0 (s, CH<sup>7</sup>), 123.4 (s, C<sub>q</sub>), 122.8 (s, C<sub>q</sub>), 122.5 (q, *J* = 3.7 Hz, CH<sup>2</sup>), 121.7 (q, *J* = 32.1 Hz, C-CF<sub>3</sub>), 117.9 (q, *J* = 4.1 Hz, CH<sup>4</sup>), 116.8 (s, CH<sup>5</sup>), 110.7 (s, CH<sup>1</sup>), 110.6 (s, CH<sup>8</sup>), 34.9 (s, C(CH<sub>3</sub>)<sub>3</sub>), 32.1 (s, C(CH<sub>3</sub>)<sub>3</sub>). <sup>19</sup>F NMR (282 MHz, CDCl<sub>3</sub>) δ -60.1. Anal. Calcd. for C<sub>17</sub>H<sub>16</sub>F<sub>3</sub>N (291.32): C, 70.09; H, 5.54; N, 4.81. Found: C, 69.82; H, 5.72; N, 4.63. See Supplementary Figs. 14 and 15.

### X-Ray Crystallography.

Crystals of **1** and **2** suitable for X-ray diffraction study were obtained by layering a toluene solution with hexanes. Complex **1** and **2** crystallizes with two independent molecules in the unit cell and molecules of toluene. The CF<sub>3</sub>-group was disordered over two half-populated positions for the complex **1** (independent molecule A). For the final refinement, the contribution of severely disordered toluene molecules in the crystals of **1** was removed from the diffraction data with PLATON/SQUEEZE.<sup>1,2</sup> Crystals were mounted in oil on glass fiber and fixed on the diffractometer in a cold nitrogen stream. Data were collected using an Oxford Diffraction Xcalibur-3/Sapphire3-CCD diffractometer with graphite monochromated Mo K<sub>α</sub> radiation ( $\lambda = 0.71073 \text{ \AA}$ ) at 140 K. Data were processed using the CrystAlisPro-CCD and -RED software.<sup>3</sup> The structure was solved by direct methods and refined by the full-matrix least-squares against F<sup>2</sup> in an anisotropic (for non-hydrogen atoms) approximation. All hydrogen atom positions were refined in isotropic approximation in a “riding” model with the U<sub>iso</sub>(H) parameters equal to 1.2 U<sub>eq</sub>(C<sub>*i*</sub>), for methyl groups equal to 1.5 U<sub>eq</sub>(C<sub>*ii*</sub>), where U(C<sub>*i*</sub>) and U(C<sub>*ii*</sub>) are respectively the equivalent thermal parameters of the carbon atoms to which the corresponding H atoms are bonded. All calculations were performed using the SHELXTL software.<sup>4</sup>

The principal crystallographic data and refinement parameters:

Complex **1**, CCDC number 1916996, C<sub>51</sub>H<sub>62</sub>AuF<sub>3</sub>N<sub>2</sub>, Monoclinic, space group *P*2<sub>1</sub>/*n*, *a* = 23.0603(9) Å, *b* = 15.7169(5) Å, *c* = 26.0909(9) Å,  $\beta$  = 103.114(4)°, *V* = 9209.7(6) Å<sup>3</sup>, *Z* = 8, *d*<sub>calc</sub> = 1.380 g cm<sup>-3</sup>,  $\mu$  = 3.242 mm<sup>-1</sup>, colorless/block, crystal size 0.25 × 0.21 × 0.09 mm, *F*(000)

= 3904,  $T_{\min}/T_{\max}$  0.73420/1.00000,  $R_1 = 0.0341$  (from 18085 unique reflections with  $I > 2\sigma(I)$ ;  $R_{\text{int}} = 0.0449$ ,  $R_{\text{sigma}} = 0.0392$ ) and  $wR_2 = 0.0852$  (from all 73935 unique reflections),  $GOF = 1.096$ ,  $\Delta\rho_{\min}/\Delta\rho_{\max} = 1.65/-1.28$ .

Complex **2**, CCDC number 1916995,  $\text{C}_{41}\text{H}_{45}\text{AuF}_6\text{N}_2$ , Triclinic, space group  $P-1$ ,  $a = 13.2995(6)$  Å,  $b = 14.8662(6)$  Å,  $c = 26.4244(10)$  Å,  $\alpha = 74.133(4)^\circ$ ,  $\beta = 77.531(3)^\circ$ ,  $\gamma = 71.883(4)^\circ$ ,  $V = 4727.0(4)$  Å<sup>3</sup>,  $Z = 4$ ,  $d_{\text{calc}} = 1.232$  g cm<sup>-3</sup>,  $\mu = 3.160$  mm<sup>-1</sup>, colorless/block, crystal size  $0.16 \times 0.11 \times 0.07$  mm,  $F(000) = 1752$ ,  $T_{\min}/T_{\max}$  0.70618/1.00000,  $R_1 = 0.0396$  (from 18562 unique reflections with  $I > 2\sigma(I)$ ;  $R_{\text{int}} = 0.0548$ ,  $R_{\text{sigma}} = 0.0852$ ) and  $wR_2 = 0.0754$  (from all 41002 unique reflections),  $GOF = 1.022$ ,  $\Delta\rho_{\min}/\Delta\rho_{\max} = 1.15/-1.28$ .

### Supplementary References

1. Spek, A. L. Structure validation in chemical crystallography. *Acta Cryst.* **D65**, 148–155 (2009).
2. van der Sluis, P. & Spek, A. L. BYPASS: an effective method for the refinement of crystal structures containing disordered solvent regions. *Acta Cryst.* **A46**, 194–201 (1990).
3. *Programs CrysalisPro*, Oxford Diffraction Ltd., Abingdon, UK (2010).
4. Sheldrick, G.M. SHELX-97 and SHELX-2018/3 – Programs for crystal structure determination (SHELXS) and refinement (SHELXL), *Acta Cryst.* **C71**, 3–8 (2015).
